# Supplementary material for: The need for fission-track data transparency and sharing
Source: Copernicus journal article supplement (doi:10.5194/gchron-7-45-2025), 2025-02-25
Supplement: Supplementary file 1 [file gchron-7-45-2025-supplement.pdf]

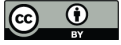

*Supplement of*

## **The need for fission-track data transparency and sharing**

**Murat T. Tamer et al.**

*Correspondence to:* Murat T. Tamer (murat@ies.ac.cn)

The copyright of individual parts of the supplement might differ from the article licence.

This supplementary file contains Figure S1, Table S1, and Table S2.

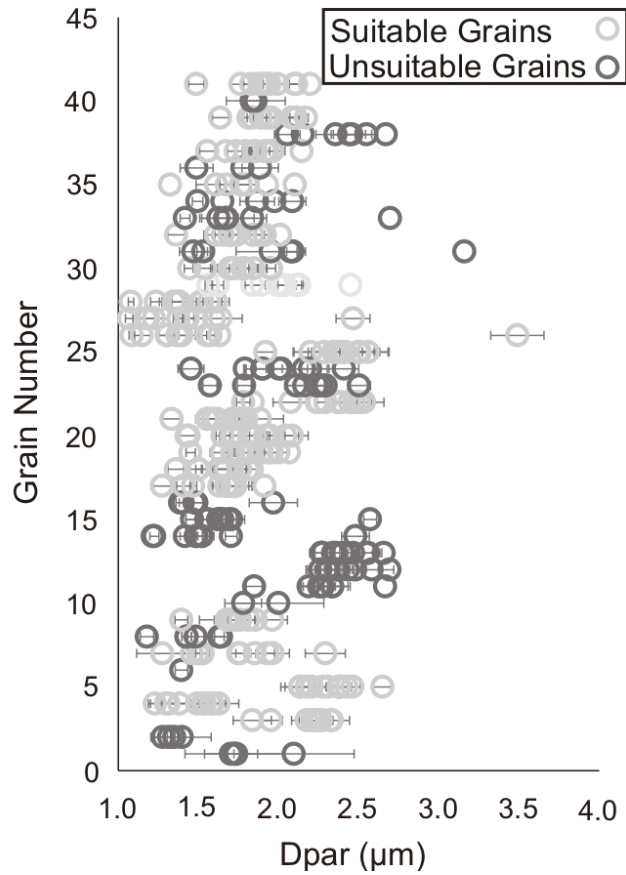

Figure S1: Dpar measurements on suitable (grey) and unsuitable (dark grey) grains. Each circle represents the mean (with an error bar showing one standard deviation, if reported) dpar for that grain. Values for suitable grains tend to cluster, with occasional outliers. Unsuitable grains tended to result in more dispersed results.

Table S1: List of participants. UT: University of Texas at Austin; ATOMKI: Institute for Nuclear Research, Debrecen, Hungary; UG: University of Göttingen; UO: University of Oklahoma; UM: University of Melbourne; IGG-CNR: Institute of Geosciences and Earth Resources, National Research Council of Italy; APLLC: Apatite.com Partners Limited Liability.

| Analyst | Lab | Name & Affiliation at the time of participation |
|---------|-----|-------------------------------------------------|
| 1       | 1   | Anonymous (UM)                                  |
| 2       | 2   | M. Tamer (UT)                                   |
| 3       | 3   | Anonymous                                       |
| 4       | 4   | Anonymous                                       |
| 5       | 5   | Anonymous                                       |
| 6       | 6/7 | R. Arató (ATOMKI/UG)                            |
| 7       | 8   | G. Jepson (UO)                                  |
| 8       | 9   | Anonymous                                       |
| 9       | 9   | Anonymous                                       |
| 10      | 1   | L. Chung (UM)                                   |
| 11      | 10  | M. Balestrieri (IGG-CNR)                        |
| 12      | 11  | Anonymous                                       |
| 13      | 12  | Anonymous                                       |
| 14      | 13  | Anonymous                                       |
| 15      | 14  | Anonymous                                       |
| 16*     | 15  | R. Donelick (APLLC)                             |

Table S2: Summary of the graticule measurements. N=number of measurements;  $l_{mg}$ =mean measured length on graticule;  $\sigma$ = standard deviation of mean. Numbers in parentheses denote standard errors. Analyst numbers are replaced with letters to preserve anonymity at g@h. \*: Technical problem with the xml file.

| Analyst | Graticule 1                     |     |                            |                            | Graticule 2                     |     |                            |                            |
|---------|---------------------------------|-----|----------------------------|----------------------------|---------------------------------|-----|----------------------------|----------------------------|
|         | Target Length ( $\mu\text{m}$ ) | N   | $l_{mg}$ ( $\mu\text{m}$ ) | $\sigma$ ( $\mu\text{m}$ ) | Target Length ( $\mu\text{m}$ ) | N   | $l_{mg}$ ( $\mu\text{m}$ ) | $\sigma$ ( $\mu\text{m}$ ) |
| b       | 100                             | 10  | 99.83 (04)                 | 0.13                       | 100                             | 25  | 99.98 (03)                 | 0.14                       |
| n       | 20                              | 20  | 19.91 (03)                 | 0.13                       | 10                              | 100 | 10.04 (01)                 | 0.10                       |
| g       | 100                             | 1   | 99.71                      | N/A                        | N/A                             | N/A | N/A                        | N/A                        |
| o*      | 20                              | N/A | 19.82                      | N/A                        | N/A                             | N/A | N/A                        | N/A                        |
| l       | 100                             | 2   | 99.67 (13)                 | 0.19                       | 100                             | 6   | 99.99 (16)                 | 0.39                       |
